# Supplementary material
Source: PubMed Central journal article supplement (PMC4311571)
Supplement: NIHMS491422-supplement-01.pdf [file NIHMS491422-supplement-01.pdf]

## SUPPLEMENTARY FIGURE

**Supplementary Figure 1. Metabolic characteristics of male transgenic mice with 9- fold overexpression of *Dgat2* mRNA.** (A) QPCR analysis of *Dgat2* mRNA levels in the jejunum of line with 9- fold overexpression of *Dgat2* mRNA levels (*Dgat2*<sup>IntB</sup>) compared to WT mice. (B) Intestinal TG secretion measured in *Dgat2*<sup>IntB</sup> and WT male mice on a chow diet. Mice were injected with 500 mg/kg Tyloxapol into the IP cavity to block lipase activity in circulation. After 30 minutes, mice were given 200  $\mu$ l olive oil via oral gavage. Plasma TG concentration was measured before, 2 and 4 h post gavage. Data are represented as mean  $\pm$  SEM. Asterisks denote significant difference at time points compared to WT (*T-test*),  $P < 0.05$ , n= 9-10 mice. (C) Representative CARS image of TG storage in enterocytes representing the upper jejunum (S2) of *Dgat2*<sup>IntB</sup> and WT mice fed a HF diet for 9 wks, after 2 h food removal. (D) TG concentration in jejunum (S2 and S3) of 9 wks HF-fed *Dgat2*<sup>IntB</sup> and WT mice and liver of chow and 9 wks HF-fed *Dgat2*<sup>IntB</sup> and WT mice after 2 h food removal. Data are represented as mean  $\pm$  SEM. Asterisks denote significant difference compared to WT (*T-test*),  $P < 0.05$ , n= 5-6 mice.
