# Supplementary material
Source: PubMed Central journal article supplement (PMC4311571)

Supplementary

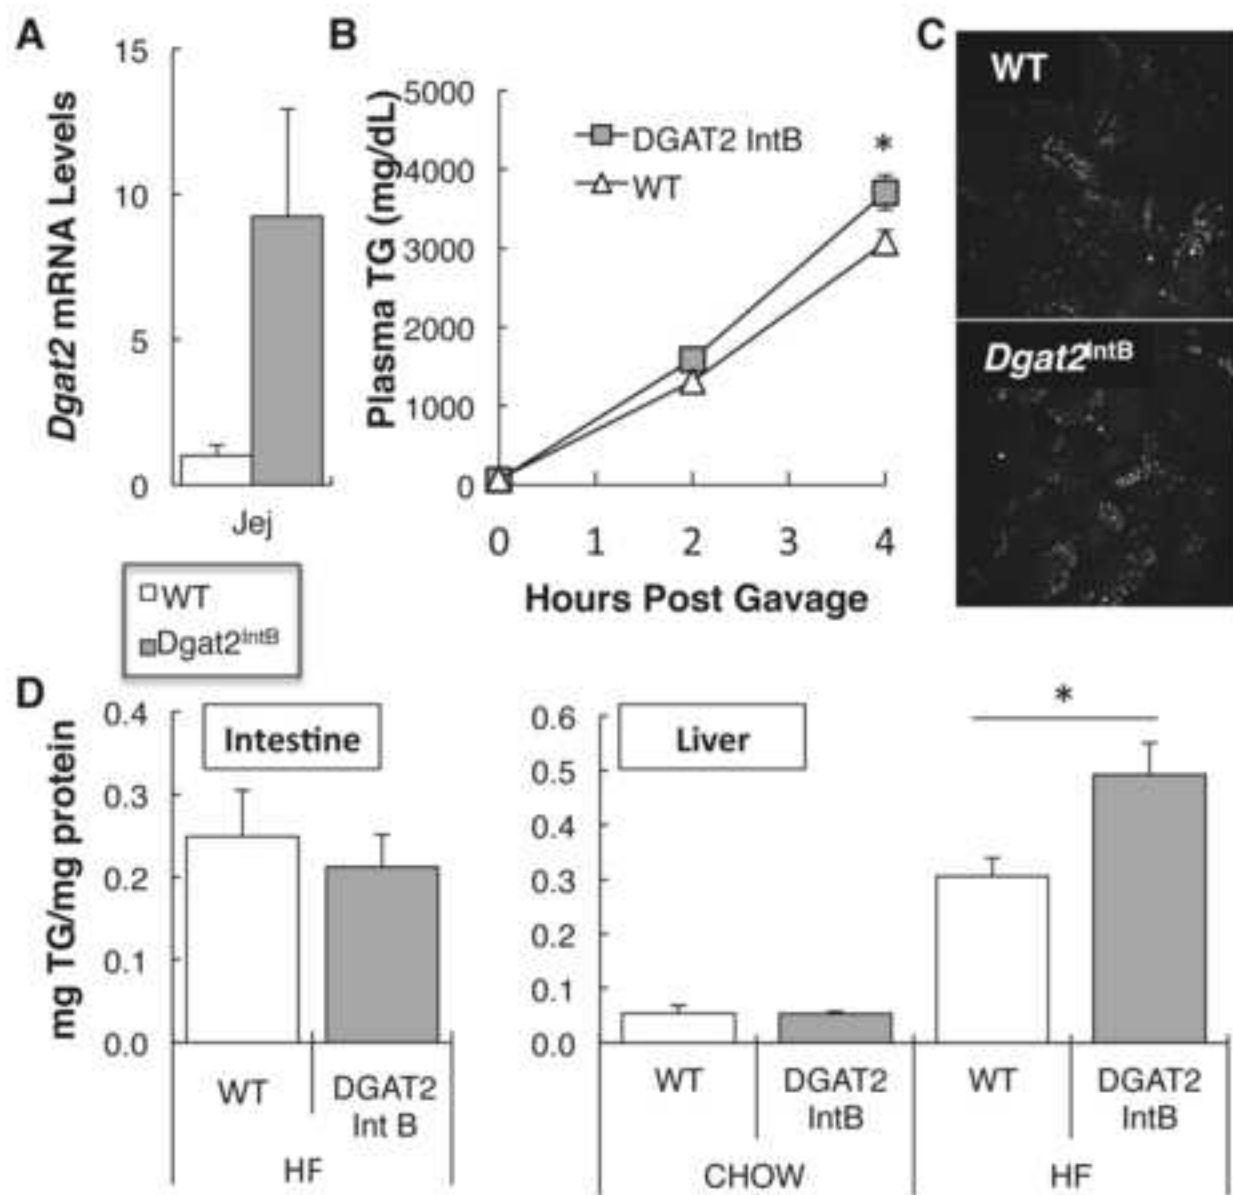

Supplement: NIHMS491422-supplement-02.pdf [file NIHMS491422-supplement-02.pdf]
